# Supplementary material
Source: PubMed Central journal article supplement (PMC4154566)
Supplement: NIHMS596806-supplement-1.pdf [file NIHMS596806-supplement-1.pdf]

# Supplementary Figure-1

Full blot of figure 2a:

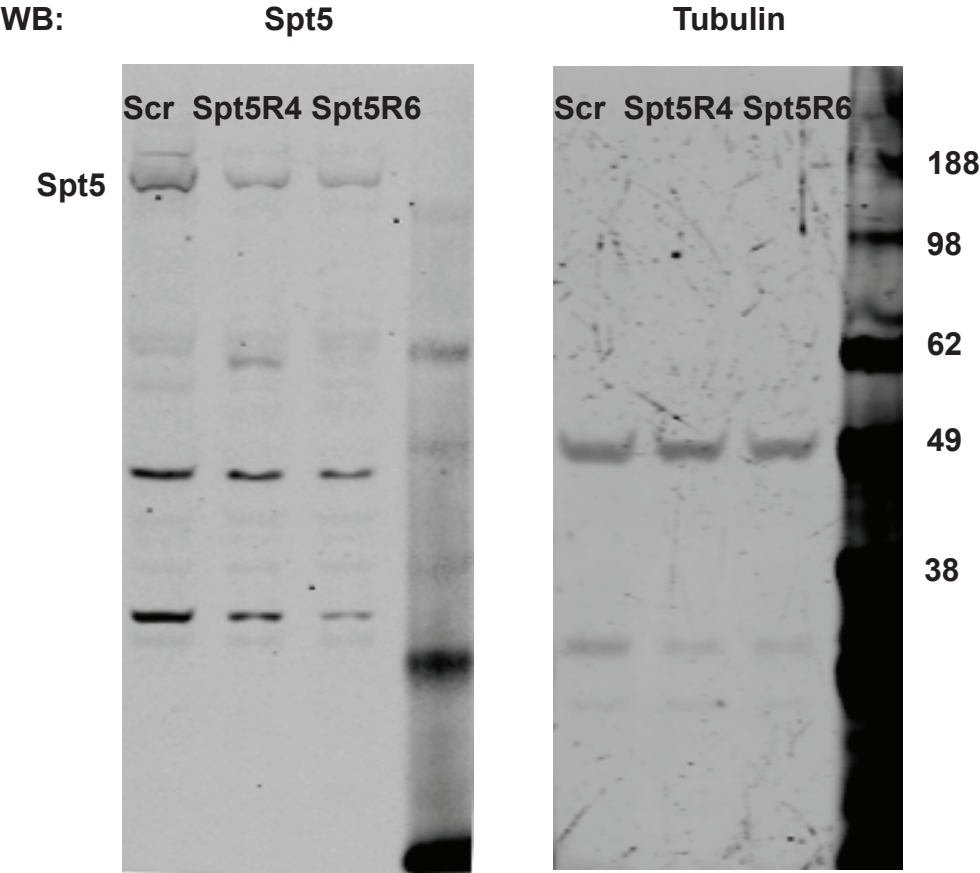

**Supplementary Figure-2**  
**Full blot of figure 3d:**

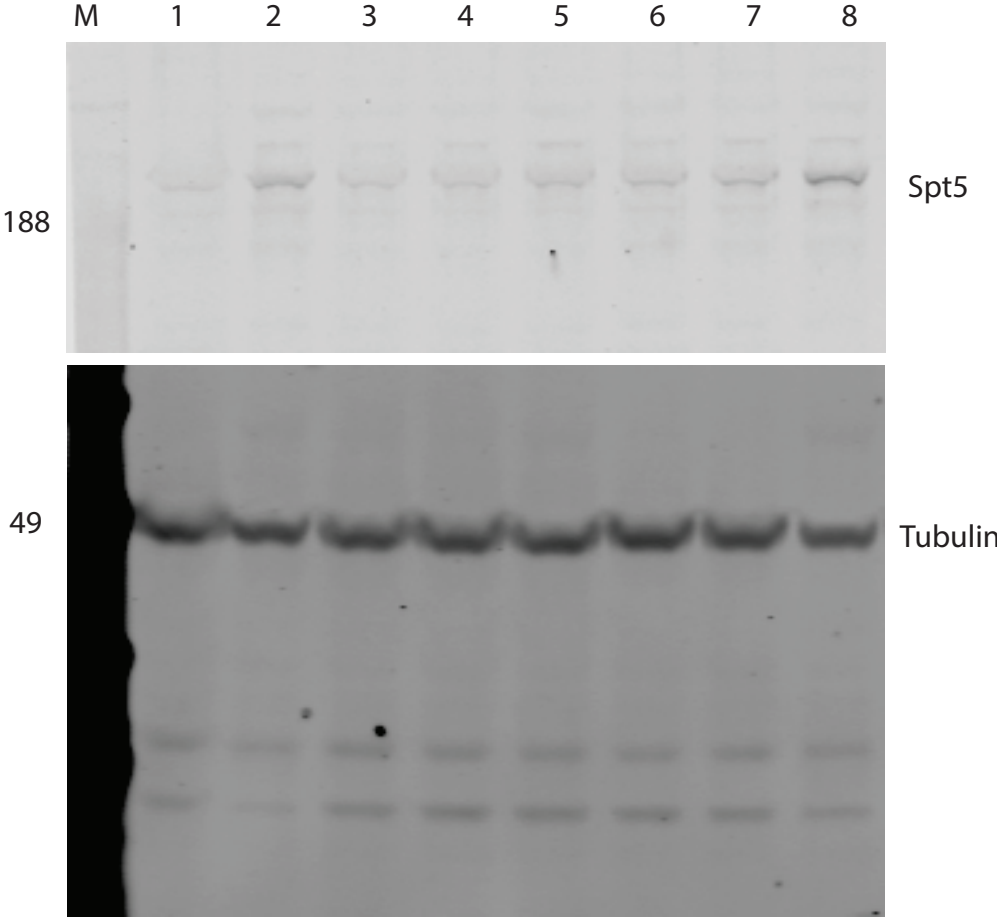

**Supplementary Table 1. List of the primer sets used in the study:**

| Gene                    | Primer name  | Primer sequences                                                              |
|-------------------------|--------------|-------------------------------------------------------------------------------|
| IgH                     | a            | FW: 5'-GAGGACTCTGGGTTTGGTGA-3'<br>REV: 5'-CTCACCCCTGGGAGGTGTATG-3'            |
|                         | b            | FW: 5'-CCCAGATGTGAGTGTCTCAGG-3'<br>REV: 5'-GGACCCCTGTGAACAGAAAA-3'            |
|                         | e            | FW: 5'-GACACGTCCAAGAAACAGC-3'<br>REV: 5'-GCCCTAGTAATAACTCTCGC-3'              |
|                         | f            | FW: 5'-GGTCACCGTCTCCTCAGGTA-3'<br>REV: 5'-CAGGTCCCCTCGGAACAT-3'               |
|                         | g            | FW: 5'-ACCTCAGTGCCTTGAAGCTG-3'<br>REV: 5'-CCATTTTTCTCAGAAGCCACTT-3'           |
|                         | h            | FW: 5'-GACTGCGTTTTGACCATCAT-3'<br>REV: 5'-CATGCAGCCATCTTGACTCT-3'             |
|                         | i            | FW: 5'-GCTGACCGAAACTGAAAAGG-3'<br>REV: 5'-AAAAATGAATGCAGTTTAGAAGTTGA-3'       |
|                         | j            | FW: 5'-TTCTGATAGAGTGGCCTTCATTT-3'<br>REV: 5'-TGAAATAATTCAGGATAATGATGCAC-3'    |
|                         | k<br>(ChIP)  | FW: 5'-GCATCCGCCCAACCTTTTC-3'<br>REV: 5'-CCAACGGCCACGCTGCTC-3'                |
|                         | k'<br>(mRNA) | FW: 5'-CGGTACTTCGCCACAGCA-3'<br>REV: 5'-ACTTGTCCACGGTCCTCTCGGTGA-3'           |
| mCherry                 | c            | FW: 5'-TCAATTCATGTACGGCTCCA-3'<br>REV: 5'-CCGCGGAGTTTAACCTTGTA-3'             |
|                         | d            | FW: 5'-ATCGTGGAACAATACGAACGA-3'<br>REV: 5'-GTTTCATAGATCTCCCGGAA-3'            |
| AID (AICDA)             |              | FW: 5'-GCTCTAGAATGGACAGCCTCTTGATG-3'<br>REV: 5'-CGGAATTCCTATCAAAGTCCCAAAGT-3' |
| Rrp40<br>(EXOSC3)       |              | FW: 5'-CGGTGTTTACTGGGTGGACT-3'<br>REV: 5'-CAAAGAAGCTGGCTCACTCC-3'             |
| Spt5 (SUPT5h)           |              | FW: 5'-TCGACTACGATCGCATCAAG-3'<br>REV: 5'-CTGTAACGGTTCCCCTCAAA-3'             |
| Cyclophilin B<br>(PPIB) |              | FW: 5'-ACGCAACATGAAGGTGCTC-3'<br>REV: 5'-ACTTGACGGTGACTTTGGG-3'               |

**Supplementary Table 2. List of the shRNA sequences used in the study:**

| <b>Gene</b>    | <b>shRNA</b> | <b>Sense strand sequence</b> |
|----------------|--------------|------------------------------|
| Spt5 (SUPT5h)  | SUPT5h-4     | 5'-CCCAATCTGTGGACTGTCAA-3'   |
|                | SUPT5h-6     | 5'-GCTGATGTTGACGATGAGTAT-3'  |
| Spt4 (SUPT4h)  | SUPT4h-1     | 5'-AGATGGTATATGACTGCACTA-3'  |
|                | SUPT4h-2     | 5'-GTCAAGACTATAGACCAGTTT-3'  |
| Rrp40 (EXOSC3) | EXOSC3-2     | 5'-GCAGGCTATTAGCTCCAGATT-3'  |
|                | EXOSC3-4     | 5'-GATTGGCATAGTGACAGCTAA-3'  |
| Ctrl-RNAi      |              | 5'-CAACAAGATGAAGAGCACCAA-3'  |
